# Supplementary material for: High internal phase agar hydrogel dispersions in cocoa butter and chocolate as a route towards reducing fat content
Source: Royal Society of Chemistry journal article supplement (doi:10.1039/c3fo60122f), 2013-01-01
Supplement: c3fo60122f.pdf [file c3fo60122f.pdf]

# High internal phase Agar hydrogel dispersions in cocoa butter and chocolate as a route towards reducing fat content

*Thomas S. Skelhon, Patrik K. A. Olsson, Adam R. Morgan and Stefan A. F. Bon*

[www.bonlab.info](http://www.bonlab.info)

## Supporting Information

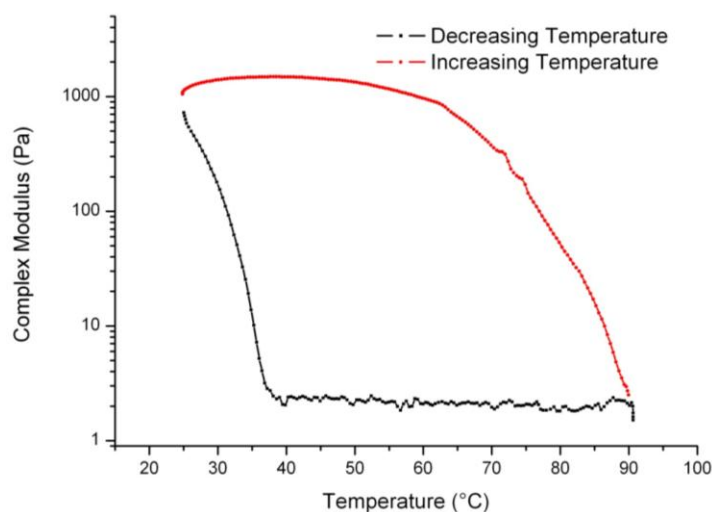

**Fig S1.** Thermal Modulus hysteresis of a 2% w/w agar gel

Using Kinexus Rheometer Ultra as described in the Materials and Methods section of the main article, a 2% w/w aqueous agar solution was heated to 90°C before being dispensed onto the pre-heated parallel plate geometry of the rheometer. A decreasing, immediately followed by an increasing temperature oscillatory measurement was then conducted at 1 Hz, 0.05 mm amplitude displacement with a plate gap size of 1 mm. These parameters lie within the LVER for the solution over the temperature range measured.
